# Supplementary material
Source: ML conference proceedings conference paper supplement (https://openaccess.thecvf.com/content/CVPR2026/html/Kim_Can_Natural_Image_CVPR_2026_paper.html)
Supplement: Supplementary file 1 [file Kim_Can_Natural_Image_CVPR_2026_supplemental.pdf]

# Can Natural Image Autoencoders Compactly Tokenize fMRI Volumes for Long-Range Dynamics Modeling?

## Appendix

### A. Implementation Details

For the 2D DCAE, we brought the unmodified `dc-ae-f32c32-in-1.0` checkpoint provided by Chen et al. [2] for all 2D natural image DCAE experiments.

All experiments were conducted on the NVIDIA A100-40GB and RTX A6000 GPUs. We used `fp16` mixed precision for the training of all models except for TFF due to NaN error during training.

We used `BCEWithLogitsLoss` for the classification task, and used `pos-weight` option for the ADHD task to account for class imbalance. We used `L1Loss` for the regression tasks.

For the voxel-based models, TFF, SwiFT, and TABLET, training was performed by randomly sampling consecutive 3D volumes. For evaluation, following Kim et al. [3], we computed the final prediction by averaging the model outputs over all possible windows starting from the first frame.

**Shared Settings** We used the following strategy for all of the experiments, unless explicitly stated.

- `Optimizer`: AdamW using a cosine decay learning rate scheduler, with weight decay of  $10^{-2}$ .
- `Hyperparameter Search`: For the UKB-Sex and HCP-Sex tasks, we searched the hyperparameter based on the validation AUROC for each model. For the UKB-Age, HCP-Age, and HCP-Intelligence tasks, we searched based on the validation MAE. For ADHD, we searched based on the validation loss to consider the `pos-weight` for the class imbalance.
- `Early Stopping`: We chose the early-stopped model for the BrainNetCNN, BNT, meanMLP, Brain-JEPA, and TFF by default. As we observed that SwiFT and TABLET are more stable during training, we report results from the final epoch for all tasks.

**XGBoost** We grid searched for hyperparameter tuning of XGBoost for the following.

- `Maximum depth`: Chosen between 3 and 5
- `Minimal child weight`: Chosen between 1 and 7
- `Gamma`: Chosen between 0.0 and 0.4
- `Learning rate`: Chosen between 0.05 and 0.3
- `Colsample by tree`: Chosen between 0.6 and 0.9

**BrainNetCNN** We trained BrainNetCNN with the following setup:

- `Learning rate`: Chosen between  $1 \times 10^{-6}$  and  $2 \times 10^{-4}$
- `Batch size`: 64
- `Epochs`: 100 epochs of training

**Brain Network Transformer** We trained Brain Network Transformer with the following setup:

- `Learning rate`: Chosen between  $1 \times 10^{-6}$  and  $2 \times 10^{-4}$
- `Batch size`: 64
- `Epochs`: 100 epochs of training

**meanMLP** We trained meanMLP with the following setup:

- `Learning rate`: Chosen between  $1 \times 10^{-4}$  and  $1 \times 10^{-2}$
- `Batch size`: 32
- `Epochs`: 100 epochs of training

**Brain-JEPA** We trained Brain-JEPA from scratch for fair comparison with the following setup.

- Learning rate: Chose between  $1 \times 10^{-5}$  and  $7 \times 10^{-4}$ .
- Batch size: 16
- Epochs: 50 epochs of training

**TFF** We trained TFF with the following setup:

- Phase 1
  - Learning rate:  $3 \times 10^{-3}$  for UKB, ADHD, and  $7 \times 10^{-4}$  for HCP
  - Batch size: 4
  - Epochs: 100 epochs of training
- Phase 2
  - Learning rate:  $1 \times 10^{-5}$  for UKB, ADHD, and chosen between  $1 \times 10^{-5}$  and  $1 \times 10^{-6}$
  - Batch size: 2
  - Epochs: 50 epochs of training
- Fine-tuning
  - Learning rate: Chosen between  $1 \times 10^{-5}$  and  $1 \times 10^{-6}$  for UKB and ADHD, chosen between  $3 \times 10^{-7}$  and  $1 \times 10^{-6}$  for HCP,
  - Batch size: 4
  - Epochs: 10 epochs of training for UKB-Sex, 20 epochs of training for HCP, UKB-Age, and 30 epochs of training for ADHD.

**SwiFT** We trained SwiFT with the following setup:

- Learning rate: Chosen between  $1 \times 10^{-6}$  and  $5 \times 10^{-5}$
- Batch size: 4
- Epochs: 25 epochs of training for UKB, HCP, 30 epochs for ADHD.

**TABLET** We trained TABLET with the following setup:

- Learning rate: Chosen between  $3 \times 10^{-7}$  and  $5 \times 10^{-5}$
- Batch size: 4
- Epochs: 50 epochs of training for HCP-Sex, HCP-Intelligence, ADHD, 30 epochs for age regression, 15 epochs for UKB-Sex.

## B. Training Details of 3D fMRI-trained DCAE

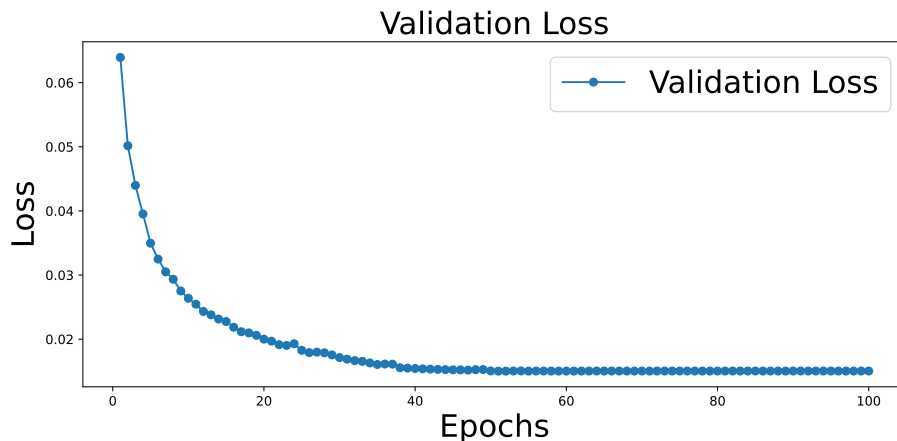

Figure 1. Validation Loss Curve for Training of 3D DCAE.

We developed 3D DCAE by adapting the architecture of 2D DCAE [2] to handle 3D volume inputs. To achieve this, we replaced 2D convolutional layers with 3D convolutional layers and adjusted components such as RMS normalization, batch normalization, `PixelUnshuffle`, and `PixelShuffle` to process 3D data effectively. The model was configured with 1 input channel, 1024 latent channels, encoder-decoder width of [16, 64, 256, 256, 1024, 1024], and encoder-decoder depth of [0, 2, 2, 5, 5, 5], to make the same compression ratio as the 2D DCAE.

For training, we utilized a dataset of 8,178 subjects from the UK-Biobank, splitting it into training and validation sets with a 9:1 ratio and stratification based on sex and age. The model was trained for 100 epochs with an initial learning rate of  $4 \times 10^{-5}$ , which was gradually reduced using `ReduceLRonPlateau` scheduler. During each epoch, we randomly selected a single fMRI frame from the full set of frames for each subject to train the model. The training process used  $\mathcal{L}_2$  reconstruction loss and the AdamW optimizer with a weight decay of  $1 \times 10^{-4}$ .

As the training curve in Fig. 1 shows, we made every effort to train the 3D DCAE model to achieve the best performance and ensure full convergence, for fair comparison.

## C. Additional Experimental Results

### C.1. Experiments with Matched $T$

We report the performance of TABLET with  $T = 20, 50$  in Tab. A1 on HCP and ADHD-200. The results demonstrate that TABLET shows comparable performance to SwiFT. Therefore, it proves that TABLET is able to maintain competitive performance even with a reduced number  $T$ , highlighting that the performance gain in Tab. 1 is not solely from the increased  $T$ , but rather from the effectiveness of the proposed method itself.

Table A1. Results of experiments with matched  $T$  on HCP and ADHD-200.

| Model               | HCP         |              |              |              |              |              | ADHD-200     |              |              |             |              |              |
|---------------------|-------------|--------------|--------------|--------------|--------------|--------------|--------------|--------------|--------------|-------------|--------------|--------------|
|                     | Sex         |              |              | Age          |              |              | Intelligence |              |              | Diagnosis   |              |              |
|                     | ACC         | AUC          | F1           | MSE          | MAE          | $\rho$       | MSE          | MAE          | $\rho$       | ACC         | AUC          | F1           |
| SwiFT ( $T = 20$ )  | <b>93.1</b> | 0.978        | <b>0.937</b> | <b>0.776</b> | 0.719        | 0.450        | 0.940        | 0.782        | 0.297        | 63.3        | 0.693        | <b>0.623</b> |
| TABLET ( $T = 20$ ) | 91.6        | <b>0.980</b> | 0.923        | 0.784        | <b>0.710</b> | <b>0.460</b> | <b>0.866</b> | <b>0.763</b> | <b>0.340</b> | <b>64.4</b> | <b>0.717</b> | 0.621        |
| SwiFT ( $T = 50$ )  | 92.2        | 0.972        | 0.929        | 0.764        | <b>0.699</b> | 0.460        | <b>0.865</b> | <b>0.758</b> | <b>0.354</b> | 63.9        | 0.701        | <b>0.627</b> |
| TABLET ( $T = 50$ ) | <b>93.4</b> | <b>0.986</b> | <b>0.940</b> | <b>0.763</b> | 0.704        | <b>0.473</b> | 0.916        | 0.778        | 0.334        | <b>64.3</b> | <b>0.710</b> | 0.615        |

### C.2. HBN-Movie Experiments

To test on a more temporally dynamic task, we experimented on Healthy Brain Network (HBN)-Movie [1], which includes 680 subjects and 1,360 fMRI scans where each subject watched two movies. We trained the models to predict which movie was being viewed. As shown in Tab. A2, TABLET achieves performance comparable to SwiFT with the same temporal length  $T$ , and outperforms with longer  $T$ , which demonstrates that TABLET can handle the temporal dynamics of fMRI data.

Table A2. Results on HBN-Movie.

| Model                | HBN-Movie              |                          |                          |
|----------------------|------------------------|--------------------------|--------------------------|
|                      | ACC                    | AUC                      | F1                       |
| SwiFT ( $T = 50$ )   | 71.7 $\pm$ 4.29        | 0.810 $\pm$ 0.040        | 0.717 $\pm$ 0.040        |
| TABLET ( $T = 50$ )  | 74.7 $\pm$ 2.38        | 0.826 $\pm$ 0.033        | 0.750 $\pm$ 0.024        |
| TABLET ( $T = 250$ ) | <b>82.1</b> $\pm$ 1.82 | <b>0.976</b> $\pm$ 0.014 | <b>0.847</b> $\pm$ 0.015 |

### C.3. Axis Aggregation Scheme Variations

We varied the number of tokens and the latent dimensionality while keeping the total number of values fixed at  $27 \times 3072 = 82,944$  and setting  $T = 256$ . In other words, we changed the number of tokens that are combined together in the token aggregation step, where combining a larger number of tokens together leads to a larger token dimensionality while reducing the number of total resulting tokens. Since the tokens are only concatenated and rearranged in this step, the total number of values are kept constant (82,944). The results are shown in Tab. A3. The results indicate that these adjustments do not lead to significant differences in downstream task performance.

Table A3. Results on HCP and ADHD-200 with varying axis aggregation schemes.

| Model        | # Token | Dim.  | HCP                      |                          |                          | ADHD-200               |                          |                          |
|--------------|---------|-------|--------------------------|--------------------------|--------------------------|------------------------|--------------------------|--------------------------|
|              |         |       | Intelligence             |                          |                          | Diagnosis              |                          |                          |
|              |         |       | MSE                      | MAE                      | $\rho$                   | ACC                    | AUC                      | F1                       |
| TABLET       | 27      | 3072  | 0.835 $\pm$ 0.053        | 0.741 $\pm$ 0.028        | 0.392 $\pm$ 0.062        | <b>65.8</b> $\pm$ 3.50 | 0.729 $\pm$ 0.029        | 0.630 $\pm$ 0.038        |
| TABLET Alt.1 | 9       | 9216  | <b>0.814</b> $\pm$ 0.044 | <b>0.733</b> $\pm$ 0.026 | <b>0.416</b> $\pm$ 0.061 | 65.7 $\pm$ 2.74        | 0.710 $\pm$ 0.031        | 0.632 $\pm$ 0.043        |
| TABLET Alt.2 | 3       | 27648 | 0.840 $\pm$ 0.093        | 0.736 $\pm$ 0.044        | 0.401 $\pm$ 0.035        | 65.1 $\pm$ 3.59        | <b>0.690</b> $\pm$ 0.032 | <b>0.636</b> $\pm$ 0.042 |

## D. Detailed Experimental Results

We provide the results reported in the manuscript with the standard deviation in Tab. A4, Tab. A5, and Tab. A6.

Table A4. Experimental results with standard deviation on UKB.

| Method               | UKB            |                   |                   |                   |                   |                   |
|----------------------|----------------|-------------------|-------------------|-------------------|-------------------|-------------------|
|                      | Sex            |                   |                   | Age               |                   |                   |
|                      | ACC            | AUC               | F1                | MSE               | MAE               | $\rho$            |
| XGBoost              | 84.1 $\pm$ 1.7 | 0.916 $\pm$ 0.012 | 0.830 $\pm$ 0.019 | 0.698 $\pm$ 0.013 | 0.686 $\pm$ 0.008 | 0.553 $\pm$ 0.018 |
| BrainNetCNN          | 91.7 $\pm$ 0.9 | 0.969 $\pm$ 0.007 | 0.912 $\pm$ 0.009 | 0.597 $\pm$ 0.017 | 0.618 $\pm$ 0.007 | 0.647 $\pm$ 0.012 |
| BNT                  | 92.4 $\pm$ 0.9 | 0.980 $\pm$ 0.003 | 0.919 $\pm$ 0.009 | 0.541 $\pm$ 0.016 | 0.588 $\pm$ 0.011 | 0.685 $\pm$ 0.011 |
| meanMLP              | 87.7 $\pm$ 1.8 | 0.949 $\pm$ 0.009 | 0.869 $\pm$ 0.020 | 0.672 $\pm$ 0.031 | 0.662 $\pm$ 0.016 | 0.586 $\pm$ 0.027 |
| Brain-JEPA           | 86.8 $\pm$ 0.6 | 0.943 $\pm$ 0.004 | 0.862 $\pm$ 0.007 | 0.688 $\pm$ 0.017 | 0.669 $\pm$ 0.008 | 0.574 $\pm$ 0.018 |
| TFF ( $T = 20$ )     | 98.3 $\pm$ 0.4 | 0.998 $\pm$ 0.001 | 0.982 $\pm$ 0.004 | 0.440 $\pm$ 0.029 | 0.525 $\pm$ 0.015 | 0.760 $\pm$ 0.015 |
| SwiFT ( $T = 20$ )   | 97.4 $\pm$ 0.3 | 0.998 $\pm$ 0.001 | 0.972 $\pm$ 0.003 | 0.366 $\pm$ 0.005 | 0.480 $\pm$ 0.007 | 0.800 $\pm$ 0.004 |
| SwiFT ( $T = 50$ )   | 98.1 $\pm$ 0.4 | 0.999 $\pm$ 0.001 | 0.980 $\pm$ 0.005 | 0.364 $\pm$ 0.004 | 0.477 $\pm$ 0.005 | 0.802 $\pm$ 0.003 |
| TABLET ( $T = 256$ ) | 97.6 $\pm$ 0.2 | 0.998 $\pm$ 0.000 | 0.975 $\pm$ 0.002 | 0.340 $\pm$ 0.011 | 0.466 $\pm$ 0.010 | 0.814 $\pm$ 0.009 |

Table A5. Experimental results with standard deviation on HCP sex classification and age regression.

| Method               | HCP            |                   |                   |                   |                   |                   |
|----------------------|----------------|-------------------|-------------------|-------------------|-------------------|-------------------|
|                      | Sex            |                   |                   | Age               |                   |                   |
|                      | ACC            | AUC               | F1                | MSE               | MAE               | $\rho$            |
| XGBoost              | 82.2 $\pm$ 2.5 | 0.890 $\pm$ 0.028 | 0.837 $\pm$ 0.025 | 0.859 $\pm$ 0.074 | 0.769 $\pm$ 0.033 | 0.296 $\pm$ 0.112 |
| BrainNetCNN          | 86.3 $\pm$ 4.9 | 0.937 $\pm$ 0.027 | 0.866 $\pm$ 0.049 | 0.847 $\pm$ 0.097 | 0.749 $\pm$ 0.040 | 0.372 $\pm$ 0.097 |
| BNT                  | 86.3 $\pm$ 3.0 | 0.935 $\pm$ 0.026 | 0.872 $\pm$ 0.030 | 0.794 $\pm$ 0.051 | 0.719 $\pm$ 0.027 | 0.444 $\pm$ 0.055 |
| meanMLP              | 84.5 $\pm$ 2.5 | 0.915 $\pm$ 0.018 | 0.855 $\pm$ 0.028 | 0.846 $\pm$ 0.056 | 0.751 $\pm$ 0.030 | 0.370 $\pm$ 0.087 |
| Brain-JEPA           | 73.9 $\pm$ 3.2 | 0.809 $\pm$ 0.018 | 0.761 $\pm$ 0.043 | 0.814 $\pm$ 0.037 | 0.746 $\pm$ 0.009 | 0.369 $\pm$ 0.046 |
| TFF ( $T = 20$ )     | 88.1 $\pm$ 5.0 | 0.937 $\pm$ 0.055 | 0.892 $\pm$ 0.042 | 0.888 $\pm$ 0.062 | 0.779 $\pm$ 0.036 | 0.246 $\pm$ 0.061 |
| SwiFT ( $T = 20$ )   | 93.1 $\pm$ 0.5 | 0.978 $\pm$ 0.008 | 0.937 $\pm$ 0.004 | 0.776 $\pm$ 0.043 | 0.719 $\pm$ 0.015 | 0.450 $\pm$ 0.031 |
| SwiFT ( $T = 50$ )   | 92.2 $\pm$ 1.1 | 0.972 $\pm$ 0.014 | 0.929 $\pm$ 0.010 | 0.764 $\pm$ 0.092 | 0.699 $\pm$ 0.047 | 0.460 $\pm$ 0.071 |
| TABLET ( $T = 20$ )  | 91.6 $\pm$ 1.5 | 0.980 $\pm$ 0.007 | 0.923 $\pm$ 0.014 | 0.784 $\pm$ 0.120 | 0.710 $\pm$ 0.046 | 0.460 $\pm$ 0.087 |
| TABLET ( $T = 50$ )  | 93.4 $\pm$ 1.3 | 0.986 $\pm$ 0.004 | 0.940 $\pm$ 0.011 | 0.763 $\pm$ 0.069 | 0.704 $\pm$ 0.031 | 0.473 $\pm$ 0.051 |
| TABLET ( $T = 256$ ) | 93.8 $\pm$ 0.9 | 0.987 $\pm$ 0.003 | 0.943 $\pm$ 0.008 | 0.773 $\pm$ 0.077 | 0.705 $\pm$ 0.038 | 0.473 $\pm$ 0.053 |
| TABLET (3D DCAE)     | 92.2 $\pm$ 1.7 | 0.973 $\pm$ 0.010 | 0.929 $\pm$ 0.014 | 0.767 $\pm$ 0.118 | 0.693 $\pm$ 0.043 | 0.475 $\pm$ 0.076 |
| TABLET (FT)          | 95.3 $\pm$ 1.3 | 0.986 $\pm$ 0.005 | 0.958 $\pm$ 0.011 | 0.650 $\pm$ 0.045 | 0.655 $\pm$ 0.024 | 0.552 $\pm$ 0.032 |

## E. Detailed Data Description

We provide a detailed description of each dataset used in our study in Tab. A7.

## References

- [1] Lindsay M Alexander, Jasmine Escalera, Lei Ai, Charissa Andreotti, Karina Febre, Alexander Mangone, Natan Vega-Potler, Nicolas Langer, Alexis Alexander, Meagan Kovacs, et al. An open resource for transdiagnostic research in pediatric mental health and learning disorders. *Sci. Data.*, 4(1):170181, 2017. 3
- [2] Junyu Chen, Han Cai, Junsong Chen, Enze Xie, Shang Yang, Haotian Tang, Muyang Li, and Song Han. Deep compression autoencoder for efficient high-resolution diffusion models. In *The Thirteenth International Conference on Learning Representations (ICLR)*, 2025. 1, 3

Table A6. Main experimental results with standard deviation on HCP intelligence regression and ADHD diagnosis.

| Method               | HCP               |                   |                   | ADHD-200        |                   |                   |
|----------------------|-------------------|-------------------|-------------------|-----------------|-------------------|-------------------|
|                      | MSE               | MAE               | $\rho$            | ACC             | AUC               | F1                |
| XGBoost              | 0.908 $\pm$ 0.054 | 0.779 $\pm$ 0.023 | 0.292 $\pm$ 0.099 | 62.3 $\pm$ 2.5  | 0.650 $\pm$ 0.036 | 0.555 $\pm$ 0.031 |
| BrainNetCNN          | 0.967 $\pm$ 0.119 | 0.788 $\pm$ 0.044 | 0.286 $\pm$ 0.112 | 59.2 $\pm$ 10.7 | 0.640 $\pm$ 0.095 | 0.545 $\pm$ 0.118 |
| BNT                  | 0.920 $\pm$ 0.092 | 0.778 $\pm$ 0.054 | 0.318 $\pm$ 0.083 | 63.6 $\pm$ 5.4  | 0.677 $\pm$ 0.062 | 0.624 $\pm$ 0.057 |
| meanMLP              | 0.887 $\pm$ 0.076 | 0.767 $\pm$ 0.028 | 0.340 $\pm$ 0.045 | 56.8 $\pm$ 6.8  | 0.617 $\pm$ 0.067 | 0.532 $\pm$ 0.095 |
| Brain-JEPA           | 0.959 $\pm$ 0.091 | 0.799 $\pm$ 0.033 | 0.171 $\pm$ 0.051 | -               | -                 | -                 |
| TFF ( $T = 20$ )     | 0.898 $\pm$ 0.022 | 0.767 $\pm$ 0.018 | 0.312 $\pm$ 0.088 | 63.3 $\pm$ 2.3  | 0.700 $\pm$ 0.028 | 0.608 $\pm$ 0.030 |
| SwiFT ( $T = 20$ )   | 0.940 $\pm$ 0.111 | 0.782 $\pm$ 0.044 | 0.297 $\pm$ 0.080 | 63.3 $\pm$ 3.7  | 0.693 $\pm$ 0.030 | 0.623 $\pm$ 0.033 |
| SwiFT ( $T = 50$ )   | 0.865 $\pm$ 0.093 | 0.758 $\pm$ 0.046 | 0.354 $\pm$ 0.070 | 63.9 $\pm$ 3.2  | 0.701 $\pm$ 0.032 | 0.627 $\pm$ 0.030 |
| TABLET ( $T = 20$ )  | 0.866 $\pm$ 0.074 | 0.763 $\pm$ 0.042 | 0.340 $\pm$ 0.045 | 64.4 $\pm$ 3.0  | 0.717 $\pm$ 0.020 | 0.621 $\pm$ 0.039 |
| TABLET ( $T = 50$ )  | 0.916 $\pm$ 0.155 | 0.778 $\pm$ 0.063 | 0.334 $\pm$ 0.102 | 64.3 $\pm$ 2.8  | 0.710 $\pm$ 0.021 | 0.615 $\pm$ 0.037 |
| TABLET ( $T = 256$ ) | 0.835 $\pm$ 0.053 | 0.741 $\pm$ 0.028 | 0.392 $\pm$ 0.062 | 65.8 $\pm$ 3.5  | 0.729 $\pm$ 0.029 | 0.630 $\pm$ 0.038 |
| TABLET (3D DCAE)     | 0.869 $\pm$ 0.077 | 0.755 $\pm$ 0.032 | 0.387 $\pm$ 0.078 | 65.8 $\pm$ 1.7  | 0.711 $\pm$ 0.026 | 0.644 $\pm$ 0.022 |
| TABLET (FT)          | 0.796 $\pm$ 0.051 | 0.732 $\pm$ 0.028 | 0.435 $\pm$ 0.046 | -               | -                 | -                 |

Table A7. Demographic information of the datasets used in our study

| Category           | UKB              | HCP                | ADHD -200        |
|--------------------|------------------|--------------------|------------------|
| Number of subjects | 8,178            | 1,061              | 533              |
| Sex                |                  |                    |                  |
| Male, n (%)        | 4,295 (52.5%)    | 488 (46.0%)        | 207 (38.8%)      |
| Female, n (%)      | 3,883 (47.5%)    | 573 (54.0%)        | 325 (61.0%)      |
| N/A, n (%)         | -                | -                  | 1 (0.2%)         |
| Age (years)        | 54.98 $\pm$ 7.53 | 28.79 $\pm$ 3.70   | 11.94 $\pm$ 3.40 |
| Intelligence       | -                | 113.32 $\pm$ 20.50 | -                |
| Diagnosed, n (%)   | -                | -                  | 236 (44.3%)      |

- [3] Peter Kim, Junbeom Kwon, Sunghwan Joo, Sangyoon Bae, Donggyu Lee, Yoonho Jung, Shinjae Yoo, Jiok Cha, and Taesup Moon. Swift: Swin 4d fmri transformer. In *Proceedings of the Advances in Neural Information Processing Systems (NeurIPS)*, pages 42015–42037, 2023. 1
